# Supplementary material for: A new infrared nonlinear optical material BaZnGeS4 with a wide band gap and large nonlinear optical response
Source: Royal Society of Chemistry journal article supplement (doi:10.1039/d3qi01502e), 2023-01-01
Supplement: d3qi01502e1.pdf [file d3qi01502e1.pdf]

## Supporting Information

### **A New Infrared Nonlinear Optical Material BaZnGeS<sub>4</sub> with Wide Band Gap and Large Nonlinear Optical Response**

Hongshan Wang,<sup>a,b,†</sup> Xueting Pan,<sup>a,†</sup> Wang Zhao,<sup>a,b</sup> Yu Chu,<sup>a,b,\*</sup> and Junjie Li<sup>a,b,\*</sup>

---

[a] Research Center for Crystal Materials; CAS Key Laboratory of Functional Materials and Devices for Special Environments, Xinjiang Technical Institute of Physics & Chemistry, 40-1 South Beijing Road, Urumqi 830011, China

E-mails: chuy@ms.xjb.ac.cn, lijunjie@ms.xjb.ac.cn

[b] Center of Materials Science and Optoelectronics Engineering, University of Chinese Academy of Sciences, Beijing 100049, China

[†] These authors contributed equally to this work.

**Table S1.** Structure and optical properties of the  $A^{II}B^{II}C^{IV}D_4^{VI}$  family compounds.

| No. | Compound                      | Space group        | Band gap (eV) | SHG( $\times$ AGS) | LIDT( $\times$ AGS) | $\Delta n$   |                | Ref.             |
|-----|-------------------------------|--------------------|---------------|--------------------|---------------------|--------------|----------------|------------------|
| 1   | <b>BaZnGeS<sub>4</sub></b>    | <b><i>Fdd2</i></b> | <b>3.36</b>   | <b>0.8</b>         | <b>5.4</b>          | <b>0.135</b> | <b>P<br/>M</b> | <b>This work</b> |
| 2   | SrZnGeS <sub>4</sub>          | <i>Fdd2</i>        | 3.63          | 0.9                | 35                  | 0.165        | PM             | 1                |
| 3   | SrCdSiS <sub>4</sub>          | <i>Ama2</i>        | 3.61          | 1.1                | 20.4                | 0.165        | PM             | 2                |
| 4   | BaZnSnS <sub>4</sub>          | <i>Fdd2</i>        | 3.25          | 0.6                | 9.8                 | 0.17         | PM             | 3                |
| 5   | SrZnSnS <sub>4</sub>          | <i>Fdd2</i>        | 2.83          | 0.4a               | N/A                 | 0.2          | PM             | 4                |
| 6   | BaHgSnS <sub>4</sub>          | <i>Pnn2</i>        | N/A           | N/A                | N/A                 | N/A          | N/<br>A        | 5                |
| 7   | $\beta$ -BaHgSnS <sub>4</sub> | <i>Ama2</i>        | 2.77          | 2.8                | N/A                 | $\sim$ 0.21  | PM             | 6                |
| 8   | SrHgSnS <sub>4</sub>          | <i>Ama2</i>        | 2.72          | 1.9                | N/A                 | N/A          | PM             | 6                |
| 9   | SrCdGeS <sub>4</sub>          | <i>Ama2</i>        | 2.6           | 2                  | N/A                 | N/A          | PM             | 7                |
| 10  | BaCdGeS <sub>4</sub>          | <i>Fdd2</i>        | 2.58          | 0.3                | 13                  | 0.149        | PM             | 8                |
| 11  | BaMnSnS <sub>4</sub>          | <i>Fdd2</i>        | 1.9           | 1.2                | 10.2                | 0.168        | PM             | 8                |
| 12  | BaCdSnS <sub>4</sub>          | <i>Fdd2</i>        | 2.3           | 0.7                | N/A                 | N/A          | NP<br>M        | 9                |
| 13  | SrCdSnS <sub>4</sub>          | <i>Fdd2</i>        | 2.05          | 1.3                | 10                  | 0.22         | PM             | 10               |
| 1   | BaZnSiSe <sub>4</sub>         | <i>Ama2</i>        | 2.71          | 1/3                | N/A                 | N/A          | N/<br>A        | 11               |
| 2   | BaZnGeSe <sub>4</sub>         | <i>Ama2</i>        | 2.46          | 1                  | N/A                 | N/A          | PM             | 11               |
| 3   | BaHgGeSe <sub>4</sub>         | <i>Ama2</i>        | 2.49          | 4.7                | N/A                 | N/A          | PM             | 12               |
| 4   | SrHgGeSe <sub>4</sub>         | <i>Ama2</i>        | 2.42          | 4.8                | N/A                 | N/A          | PM             | 12               |
| 5   | SrZnSnSe <sub>4</sub>         | <i>Fdd2</i>        | 2.14          | 0.33               | 5                   | N/A          | PM             | 3                |
| 6   | SrHgSnSe <sub>4</sub>         | <i>Fdd2</i>        | 2.07          | 4.9                | N/A                 | N/A          | PM             | 6                |
| 7   | BaHgSnSe <sub>4</sub>         | <i>Fdd2</i>        | 1.98          | 5.1                | N/A                 | $\sim$ 0.29  | PM             | 6                |

|    |                       |             |      |     |     |               |         |    |
|----|-----------------------|-------------|------|-----|-----|---------------|---------|----|
| 8  | SrCdGeSe <sub>4</sub> | <i>Ama2</i> | 1.9  | 5   | N/A | N/A           | PM      | 7  |
| 9  | BaZnSnSe <sub>4</sub> | <i>Fdd2</i> | 1.88 | 1   | 5.7 | 0.26          | PM      | 3  |
| 10 | BaCdSnSe <sub>4</sub> | <i>Fdd2</i> | 1.79 | 1.6 | N/A | 0.110<br>@1μm | NP<br>M | 13 |
| 11 | BaCdGeSe <sub>4</sub> | <i>Fdd2</i> | 1.77 | 0.5 | N/A | N/A           | PM      | 14 |
| 12 | SrCdSnSe <sub>4</sub> | <i>Fdd2</i> | 1.54 | 1.5 | 5   | 0.33          | PM      | 10 |
| 13 | SrZnSiSe <sub>4</sub> | <i>Ama2</i> | 1.95 | 2   | 10  | 0.1           | PM      | 15 |
| 14 | SrMgSnSe <sub>4</sub> | <i>Fdd2</i> | 2.0  | /   | /   | /             | /       | 16 |

**Table S2.** Crystal data and structure refinements of  $\text{Mg}_{0.6}\text{Cd}_{1.4}\text{GeS}_4$ ,  $\text{CaCdGeS}_4$ , and  $\text{BaZnGeS}_4$ .

| Empirical formula                                                                                | $\text{Mg}_{0.6}\text{Cd}_{1.4}\text{GeS}_4$             | $\text{CaCdGeS}_4$                                         | $\text{BaZnGeS}_4$                                           |
|--------------------------------------------------------------------------------------------------|----------------------------------------------------------|------------------------------------------------------------|--------------------------------------------------------------|
| Formula weight                                                                                   | 372.78                                                   | 353.31                                                     | 403.08                                                       |
| Temperature (K)                                                                                  | 298                                                      | 298                                                        | 298                                                          |
| Crystal system                                                                                   | Orthorhombic                                             | Orthorhombic                                               | Orthorhombic                                                 |
| Space group                                                                                      | <i>Pnma</i>                                              | <i>Pnma</i>                                                | <i>Fdd2</i>                                                  |
| <i>a</i> (Å)                                                                                     | 13.0381(8)                                               | 13.4040(7)                                                 | 21.0291(6)                                                   |
| <i>b</i> (Å)                                                                                     | 7.6057(5)                                                | 7.8948(4)                                                  | 21.7992(6)                                                   |
| <i>c</i> (Å)                                                                                     | 6.1008(3)                                                | 6.2078(4)                                                  | 12.3028(3)                                                   |
| <i>V</i> (Å <sup>3</sup> )                                                                       | 604.98(6)                                                | 656.92(6)                                                  | 5639.8(3)                                                    |
| <i>Z</i>                                                                                         | 4                                                        | 4                                                          | 32                                                           |
| $D_{\text{calc}}$ (g/cm <sup>3</sup> )                                                           | 4.093                                                    | 3.572                                                      | 3.798                                                        |
| Absorption coefficient (mm <sup>-1</sup> )                                                       | 11.147                                                   | 9.729                                                      | 14.171                                                       |
| <i>F</i> (000)                                                                                   | 682                                                      | 656                                                        | 5817                                                         |
| Completeness to $\theta$ (%)                                                                     | 100                                                      | 100                                                        | 98.30                                                        |
| Max. and min. transmission                                                                       | 0.7456 and 0.5499                                        | 0.7456 and 0.5454                                          | 0.7456 and 0.4791                                            |
| $2\theta$ range for data collection/ <sup>o</sup>                                                | 6.250 to 55.002                                          | 6.078 to 55.006                                            | 4.266 to 54.958                                              |
| Index ranges                                                                                     | $-16 \leq h \leq 16, -9 \leq k \leq 9, -7 \leq l \leq 7$ | $-17 \leq h \leq 17, -10 \leq k \leq 10, -8 \leq l \leq 8$ | $-27 \leq h \leq 27, -28 \leq k \leq 28, -14 \leq l \leq 15$ |
| Reflections collected                                                                            | 12804                                                    | 13541                                                      | 14300                                                        |
| Independent reflections                                                                          | 746 [ <i>R</i> (int) = 0.0685]                           | 807 [ <i>R</i> (int) = 0.0707]                             | 3022 [ <i>R</i> (int) = 0.0409]                              |
| Observed reflections [ <i>I</i> >2 $\sigma$ ( <i>I</i> )]                                        | 680                                                      | 677                                                        | 2291                                                         |
| Data / restraints / parameters                                                                   | 746 / 0 / 40                                             | 807 / 0 / 41                                               | 3022 / 1 / 132                                               |
| Absorpt correction type                                                                          | multi-scan                                               | multi-scan                                                 | multi-scan                                                   |
| Goof on <i>F</i> <sup>2</sup>                                                                    | 1.211                                                    | 1.136                                                      | 1.022                                                        |
| <i>R</i> <sub>1</sub> , <i>wR</i> <sub>2</sub> ( <i>I</i> >2 $\sigma$ ( <i>I</i> )) <sup>a</sup> | 0.0207, 0.0666                                           | 0.0239, 0.0769                                             | 0.0176, 0.0382                                               |
| <i>R</i> <sub>1</sub> , <i>wR</i> <sub>2</sub> (all data) <sup>a</sup>                           | 0.0219, 0.0677                                           | 0.0244, 0.0776                                             | 0.0225, 0.0408                                               |
| diff peak, hole (e/Å <sup>3</sup> )                                                              | 0.947, -0.901                                            | 1.496, -1.065                                              | 0.463, -1.195                                                |
| Flack parameter                                                                                  | /                                                        | /                                                          | 0.027(14)                                                    |

<sup>a</sup>  $R_1 = \frac{\sum ||F_o| - |F_c||}{\sum |F_o|}$  and  $wR_2 = [\frac{\sum w(F_o^2 - F_c^2)^2}{\sum wF_o^4}]^{1/2}$  for  $F_o^2 > 2\sigma(F_o^2)$ .

**Table S3.** Fractional atomic coordinates, equivalent isotropic displacement parameters ( $\text{\AA}^2 \times 10^3$ ), and bond valence sum (BVS) for BaZnGeS<sub>4</sub>.  $U_{\text{eq}}$  is defined as 1/3 of the trace of the orthogonalized  $U_{\text{IJ}}$  tensor.

| Atoms | Wyck. | x        | y        | z        | $U_{\text{eq}}$ | BVS <sup>[a]</sup> |
|-------|-------|----------|----------|----------|-----------------|--------------------|
| Ba(1) | 8a    | 0.25     | 0.75     | 0.68 (1) | 14(1)           | 2.31               |
| Ba(2) | 8a    | 0.50     | 0.50     | 0.43 (1) | 14(1)           | 2.32               |
| Ba(3) | 16b   | 0.50 (1) | 0.75 (1) | 0.43 (1) | 15(1)           | 2.32               |
| Zn(1) | 16b   | 0.39(1)  | 0.62 (1) | 0.69 (1) | 17(1)           | 1.90               |
| Zn(2) | 16b   | 0.67 (1) | 0.62 (1) | 0.47 (1) | 17(1)           | 1.89               |
| Ge(1) | 16b   | 0.57 (1) | 0.62 (1) | 0.64 (1) | 11(1)           | 4.05               |
| Ge(2) | 16b   | 0.61 (1) | 0.62 (1) | 0.18 (1) | 11(1)           | 4.02               |
| S(1)  | 16b   | 0.37 (1) | 0.70 (1) | 0.82 (1) | 15(1)           | 2.03               |
| S(2)  | 16b   | 0.37(1)  | 0.55 (1) | 0.82 (1) | 14(1)           | 2.01               |
| S(3)  | 16b   | 0.47 (1) | 0.62 (1) | 0.57 (1) | 14(1)           | 2.14               |
| S(4)  | 16b   | 0.53 (1) | 0.62 (1) | 0.30 (1) | 15(1)           | 2.04               |
| S(5)  | 16b   | 0.55 (1) | 0.63 (1) | 0.82 (1) | 14(1)           | 2.07               |
| S(6)  | 16b   | 0.62 (1) | 0.70 (1) | 0.57 (1) | 14(1)           | 2.05               |
| S(7)  | 16b   | 0.62 (1) | 0.55 (1) | 0.57 (1) | 14(1)           | 2.02               |
| S(8)  | 16b   | 0.70 (1) | 0.62 (1) | 0.29 (1) | 13(1)           | 2.14               |

[a] The bond valence sum is calculated by bond-valence theory ( $S_{ij} = \exp[(R_0 - R)/B]$ , where  $R$  is an empirical constant,  $R_0$  is the length of bond I (in angstroms), and  $B = 0.37$ ).

**Table S4.** Fractional atomic coordinates, equivalent isotropic displacement parameters ( $\text{\AA}^2 \times 10^3$ ), and bond valence sum (BVS) for  $\text{Mg}_{0.6}\text{Cd}_{1.4}\text{GeS}_4$ .  $U_{\text{eq}}$  is defined as 1/3 of the trace of the orthogonalized  $U_{\text{IJ}}$  tensor.

| Atoms    | Occupancy | Wyck. | x        | y         | z        | $U_{\text{eq}}$ | BVS <sup>[a]</sup> |
|----------|-----------|-------|----------|-----------|----------|-----------------|--------------------|
| Mg/Cd(1) | 0.1/0.9   | 4c    | 0.27 (1) | -0.25     | 0.49 (1) | 19(1)           | 2.08               |
| Mg/Cd(2) | 0.5/0.5   | 4b    | 0.50     | 0         | 0        | 24(1)           | 2.11               |
| Ge(1)    | 1         | 4c    | 0.41 (1) | 0.25      | 0.41 (1) | 10(1)           | 4.02               |
| S(1)     | 1         | 4c    | 0.43 (1) | -0.25     | 0.74 (2) | 13(1)           | 2.11               |
| S(2)     | 1         | 8d    | 0.33 (1) | 0.022 (1) | 0.25 (1) | 13(1)           | 1.92               |
| S(3)     | 1         | 4c    | 0.41 (1) | 0.25      | 0.77 (2) | 13(1)           | 2.04               |

[a] The bond valence sum is calculated by bond-valence theory ( $S_{ij} = \exp[(R_0 - R)/B]$ , where  $R$  is an empirical constant,  $R_0$  is the length of bond I (in angstroms), and  $B = 0.37$ ).

**Table S5.** Fractional atomic coordinates, equivalent isotropic displacement parameters ( $\text{\AA}^2 \times 10^3$ ), and bond valence sum (BVS) for  $\text{CaCdGeS}_4$ .  $U_{\text{eq}}$  is defined as 1/3 of the trace of the orthogonalized  $U_{\text{IJ}}$  tensor.

| Atoms    | Occupancy | Wyck. | x        | y        | z        | $U_{\text{eq}}$ | BVS <sup>[a]</sup> |
|----------|-----------|-------|----------|----------|----------|-----------------|--------------------|
| Ca/Cd(1) | 0.8/0.2   | 4c    | 0.27 (1) | 0.75     | 0.51 (1) | 16(1)           | 2.20               |
| Ca/Cd(2) | 0.2/0.8   | 4b    | 0.50     | 0.50     | 0        | 26(1)           | 2.20               |
| Ge(1)    | 1         | 4c    | 0.59 (1) | 0.75     | 0.41 (1) | 17(1)           | 4.03               |
| S(1)     | 1         | 4c    | 0.44 (1) | 0.75     | 0.25 (2) | 20(1)           | 2.30               |
| S(2)     | 1         | 8d    | 0.66 (1) | 0.97 (1) | 0.25 (1) | 21(1)           | 2.06               |
| S(3)     | 1         | 4c    | 0.59 (1) | 0.75     | 0.76 (2) | 21(1)           | 2.11               |

[a] The bond valence sum is calculated by bond-valence theory ( $S_{ij} = \exp[(R_0 - R)/B]$ , where  $R$  is an empirical constant,  $R_0$  is the length of bond I (in angstroms), and  $B = 0.37$ ).

**Table S6.** Anisotropic displacement parameters ( $\text{\AA}^2 \times 10^3$ ) for BaZnGeS<sub>4</sub>. The anisotropic displacement factor exponent takes the form:  $2\pi^2[h^2a^2U_{11}+2hka^*b^*U_{12}+\dots]$ .

| Atoms | U <sub>11</sub> | U <sub>22</sub> | U <sub>33</sub> | U <sub>23</sub> | U <sub>13</sub> | U <sub>12</sub> |
|-------|-----------------|-----------------|-----------------|-----------------|-----------------|-----------------|
| Ba(1) | 11(1)           | 14(1)           | 18(1)           | 0               | 0               | 0(1)            |
| Ba(2) | 12(1)           | 14(1)           | 17(1)           | 0               | 0               | 0(1)            |
| Ba(3) | 12(1)           | 14(1)           | 18(1)           | 0(1)            | -1(1)           | 0(1)            |
| Zn(1) | 14(1)           | 23(1)           | 13(1)           | 0(1)            | 2(1)            | 0(1)            |
| Zn(2) | 15(1)           | 22(1)           | 13(1)           | 0(1)            | 3(1)            | 0(1)            |
| Ge(1) | 10(1)           | 13(1)           | 10(1)           | 0(1)            | 0(1)            | 0(1)            |
| Ge(2) | 10(1)           | 13(1)           | 10(1)           | 0(1)            | 0(1)            | 0(1)            |
| S(1)  | 16(1)           | 14(1)           | 14(1)           | 1(1)            | -2(1)           | 1(1)            |
| S(2)  | 15(1)           | 14(1)           | 13(1)           | -2(1)           | -2(1)           | 0(1)            |
| S(3)  | 10(1)           | 21(1)           | 12(1)           | 0(1)            | 0(1)            | -1(1)           |
| S(4)  | 11(1)           | 20(1)           | 13(1)           | 0(1)            | 3(1)            | -1(1)           |
| S(5)  | 14(1)           | 19(1)           | 10(1)           | 0(1)            | 1(1)            | 0(1)            |
| S(6)  | 12(1)           | 14(1)           | 16(1)           | 1(1)            | 0(1)            | -1(1)           |
| S(7)  | 12(1)           | 14(1)           | 16(1)           | -1(1)           | 0(1)            | 1(1)            |
| S(8)  | 11(1)           | 17(1)           | 10(1)           | 0(1)            | 0(1)            | -1(1)           |



**Table S7.** Anisotropic displacement parameters ( $\text{\AA}^2 \times 10^3$ ) for  $\text{Mg}_{0.6}\text{Cd}_{1.4}\text{GeS}_4$ . The anisotropic displacement factor exponent takes the form:  $2\pi^2[h^2a^2U_{11}+2hka^*b^*U_{12}+\dots]$ .

| <b>Atoms</b> | <b>U<sub>11</sub></b> | <b>U<sub>22</sub></b> | <b>U<sub>33</sub></b> | <b>U<sub>23</sub></b> | <b>U<sub>13</sub></b> | <b>U<sub>12</sub></b> |
|--------------|-----------------------|-----------------------|-----------------------|-----------------------|-----------------------|-----------------------|
| Mg/Cd(1)     | 17(1)                 | 22(1)                 | 18(1)                 | 0                     | 1(1)                  | 0                     |
| Mg/Cd(2)     | 28(1)                 | 22(1)                 | 22(1)                 | -5(1)                 | 2(1)                  | 4(1)                  |
| Ge(1)        | 11(1)                 | 12(1)                 | 7(1)                  | 0                     | 0(1)                  | 0                     |
| S(1)         | 10(1)                 | 16(1)                 | 13(1)                 | 0                     | 0(1)                  | 0                     |
| S(2)         | 14(1)                 | 12(1)                 | 12(1)                 | 1(1)                  | -1(1)                 | -3(1)                 |
| S(3)         | 14(1)                 | 16(1)                 | 7(1)                  | 0                     | 0(1)                  | 0                     |

**Table S8.** Anisotropic displacement parameters ( $\text{\AA}^2 \times 10^3$ ) for  $\text{CaCdGeS}_4$ . The anisotropic displacement factor exponent takes the form:  $2\pi^2[h^2a^2U_{11}+2hka^*b^*U_{12}+\dots]$ .

| <b>Atoms</b> | <b><math>U_{11}</math></b> | <b><math>U_{22}</math></b> | <b><math>U_{33}</math></b> | <b><math>U_{23}</math></b> | <b><math>U_{13}</math></b> | <b><math>U_{12}</math></b> |
|--------------|----------------------------|----------------------------|----------------------------|----------------------------|----------------------------|----------------------------|
| Ca/Cd(1)     | 16(1)                      | 18(1)                      | 15(1)                      | 0                          | -2(1)                      | 0                          |
| Ca/Cd(2)     | 30(1)                      | 23(1)                      | 25(1)                      | -10(1)                     | -7(1)                      | -1(1)                      |
| Ge(1)        | 18(1)                      | 19(1)                      | 13(1)                      | 0                          | -1(1)                      | 0                          |
| S(1)         | 17(1)                      | 24(1)                      | 19(1)                      | 0                          | 0(1)                       | 0                          |
| S(2)         | 24(1)                      | 20(1)                      | 18(1)                      | -1(1)                      | 0(1)                       | -4(1)                      |
| S(3)         | 26(1)                      | 24(1)                      | 12(1)                      | 0                          | -1(1)                      | 0                          |

**Table S9.** Selected bond lengths (Å) of BaZnGeS<sub>4</sub>.

| Atoms        | Distance (Å) | Atoms         | Distance (Å) |
|--------------|--------------|---------------|--------------|
| Ba(1)-S(1)#1 | 3.2125(15)   | Ba(3)-S(5)#8  | 3.2515(15)   |
| Ba(1)-S(1)   | 3.2126(15)   | Ba(3)-S(6)    | 3.1880(15)   |
| Ba(1)-S(2)#2 | 3.2188(14)   | Ba(3)-S(7)#2  | 3.2257(14)   |
| Ba(1)-S(2)#3 | 3.2188(14)   | Ba(3)-S(8)#9  | 3.2285(14)   |
| Ba(1)-S(5)#3 | 3.2475(15)   | Zn(1)-S(1)    | 2.3901(17)   |
| Ba(1)-S(5)#2 | 3.2475(15)   | Zn(1)-S(2)    | 2.3995(17)   |
| Ba(1)-S(8)#4 | 3.2374(15)   | Zn(1)-S(3)    | 2.2913(16)   |
| Ba(1)-S(8)#5 | 3.2374(15)   | Zn(1)-S(5)#2  | 2.3896(14)   |
| Ba(2)-S(3)#6 | 3.2240(15)   | Zn(2)-S(4)#11 | 2.4015(13)   |
| Ba(2)-S(3)   | 3.2240(15)   | Zn(2)-S(6)    | 2.3904(16)   |
| Ba(2)-S(4)   | 3.2561(15)   | Zn(2)-S(7)    | 2.4034(16)   |
| Ba(2)-S(4)#6 | 3.2561(15)   | Zn(2)-S(8)    | 2.2885(17)   |
| Ba(2)-S(6)#2 | 3.2244(14)   | Ge(1)-S(3)    | 2.2253(12)   |
| Ba(2)-S(6)#7 | 3.2244(14)   | Ge(1)-S(5)    | 2.1867(16)   |
| Ba(2)-S(7)#6 | 3.2051(15)   | Ge(1)-S(6)    | 2.2189(15)   |
| Ba(2)-S(7)   | 3.2051(15)   | Ge(1)-S(7)    | 2.2188(15)   |
| Ba(3)-S(1)#8 | 3.2184(15)   | Ge(2)-S(1)#10 | 2.2218(16)   |
| Ba(3)-S(2)#3 | 3.2287(15)   | Ge(2)-S(2)#10 | 2.2214(16)   |
| Ba(3)-S(3)   | 3.2345(16)   | Ge(2)-S(4)    | 2.1954(15)   |
| Ba(3)-S(4)   | 3.2466(15)   | Ge(2)-S(8)    | 2.2240(13)   |

Symmetry transformations used to generate equivalent atoms:

#1  $-x+1/2, -y+3/2, z$ ; #2  $x-1/4, -y+5/4, z-1/4$ ; #3  $-x+3/4, y+1/4, z-1/4$ ; #4  $x-1/2, y, z+1/2$ ;  
#5  $-x+1, -y+3/2, z+1/2$ ; #6  $-x+1, -y+1, z$ ; #7  $-x+5/4, y-1/4, z-1/4$ ; #8  $-x+1, -y+3/2, z-1/2$ ;  
#9  $-x+5/4, y+1/4, z+1/4$ ; #10  $x+1/4, -y+5/4, z-3/4$ ; #11  $x+1/4, -y+5/4, z+1/4$

**Table S10.** Selected bond angles (°) of BaZnGeS<sub>4</sub>.

| Atoms               | Angle (°) | Atoms               | Angle (°) |
|---------------------|-----------|---------------------|-----------|
| S(1)#1-Ba(1)-S(1)   | 115.90(7) | S(7)-Ba(2)-S(6)#2   | 142.81(3) |
| S(1)-Ba(1)-S(2)#2   | 142.41(3) | S(7)#6-Ba(2)-S(7)   | 116.38(6) |
| S(1)-Ba(1)-S(2)#3   | 69.65(4)  | S(1)#8-Ba(3)-S(2)#3 | 141.88(3) |
| S(1)#1-Ba(1)-S(2)#2 | 69.65(4)  | S(1)#8-Ba(3)-S(3)   | 130.71(4) |
| S(1)#1-Ba(1)-S(2)#3 | 142.41(3) | S(1)#8-Ba(3)-S(4)   | 83.86(4)  |
| S(1)#1-Ba(1)-S(5)#3 | 72.61(4)  | S(1)#8-Ba(3)-S(5)#8 | 79.60(4)  |
| S(1)-Ba(1)-S(5)#2   | 72.61(4)  | S(1)#8-Ba(3)-S(7)#2 | 129.32(5) |
| S(1)#1-Ba(1)-S(5)#2 | 138.49(3) | S(1)#8-Ba(3)-S(8)#9 | 67.61(3)  |
| S(1)-Ba(1)-S(5)#3   | 138.49(3) | S(2)#3-Ba(3)-S(3)   | 81.32(4)  |
| S(1)-Ba(1)-S(8)#4   | 77.34(4)  | S(2)#3-Ba(3)-S(4)   | 133.21(4) |
| S(1)-Ba(1)-S(8)#5   | 77.28(4)  | S(2)#3-Ba(3)-S(5)#8 | 72.42(4)  |
| S(1)#1-Ba(1)-S(8)#5 | 77.34(4)  | S(3)-Ba(3)-S(4)     | 66.28(3)  |
| S(1)#1-Ba(1)-S(8)#4 | 77.28(4)  | S(3)-Ba(3)-S(5)#8   | 149.52(3) |
| S(2)#2-Ba(1)-S(2)#3 | 130.47(7) | S(4)-Ba(3)-S(5)#8   | 122.87(4) |
| S(2)#2-Ba(1)-S(5)#2 | 80.46(4)  | S(6)-Ba(3)-S(1)#8   | 70.78(5)  |
| S(2)#2-Ba(1)-S(5)#3 | 79.08(4)  | S(6)-Ba(3)-S(2)#3   | 116.05(5) |
| S(2)#3-Ba(1)-S(5)#3 | 80.46(4)  | S(6)-Ba(3)-S(3)     | 67.18(3)  |
| S(2)#3-Ba(1)-S(5)#2 | 79.08(4)  | S(6)-Ba(3)-S(4)     | 82.26(4)  |
| S(2)#2-Ba(1)-S(8)#5 | 136.81(3) | S(6)-Ba(3)-S(5)#8   | 138.84(4) |
| S(2)#3-Ba(1)-S(8)#5 | 67.52(3)  | S(6)-Ba(3)-S(7)#2   | 143.33(3) |
| S(2)#3-Ba(1)-S(8)#4 | 136.81(3) | S(6)-Ba(3)-S(8)#9   | 77.60(4)  |
| S(2)#2-Ba(1)-S(8)#4 | 67.52(3)  | S(7)#2-Ba(3)-S(2)#3 | 69.29(5)  |
| S(5)#2-Ba(1)-S(5)#3 | 129.83(6) | S(7)#2-Ba(3)-S(3)   | 78.65(3)  |
| S(8)#5-Ba(1)-S(5)#2 | 141.05(2) | S(7)#2-Ba(3)-S(4)   | 71.83(3)  |
| S(8)#4-Ba(1)-S(5)#2 | 64.74(3)  | S(7)#2-Ba(3)-S(5)#8 | 77.80(4)  |
| S(8)#5-Ba(1)-S(5)#3 | 64.74(3)  | S(7)#2-Ba(3)-S(8)#9 | 135.70(3) |
| S(8)#4-Ba(1)-S(5)#3 | 141.05(2) | S(8)#9-Ba(3)-S(2)#3 | 77.16(3)  |

|                     |           |                       |           |
|---------------------|-----------|-----------------------|-----------|
| S(8)#5-Ba(1)-S(8)#4 | 131.09(6) | S(8)#9-Ba(3)-S(3)     | 124.37(4) |
| S(3)#6-Ba(2)-S(3)   | 118.97(6) | S(8)#9-Ba(3)-S(4)     | 149.16(3) |
| S(3)-Ba(2)-S(4)#6   | 158.49(2) | S(8)#9-Ba(3)-S(5)#8   | 64.79(3)  |
| S(3)#6-Ba(2)-S(4)#6 | 66.29(3)  | S(1)-Zn(1)-S(2)       | 91.15(6)  |
| S(3)-Ba(2)-S(4)     | 66.29(3)  | S(3)-Zn(1)-S(1)       | 124.42(6) |
| S(3)#6-Ba(2)-S(4)   | 158.49(2) | S(3)-Zn(1)-S(2)       | 125.25(6) |
| S(3)#6-Ba(2)-S(6)#2 | 129.60(3) | S(3)-Zn(1)-S(5)#2     | 101.79(6) |
| S(3)#6-Ba(2)-S(6)#7 | 78.78(3)  | S(5)#2-Zn(1)-S(1)     | 106.31(5) |
| S(3)-Ba(2)-S(6)#2   | 78.78(3)  | S(5)#2-Zn(1)-S(2)     | 106.13(5) |
| S(3)-Ba(2)-S(6)#7   | 129.60(3) | S(4)#11-Zn(2)-S(7)    | 104.40(5) |
| S(4)-Ba(2)-S(4)#6   | 117.31(6) | S(6)-Zn(2)-S(4)#11    | 103.57(5) |
| S(6)#2-Ba(2)-S(4)#6 | 82.61(4)  | S(6)-Zn(2)-S(7)       | 91.29(5)  |
| S(6)#2-Ba(2)-S(4)   | 71.04(3)  | S(8)-Zn(2)-S(4)#11    | 100.91(5) |
| S(6)#7-Ba(2)-S(4)#6 | 71.04(3)  | S(8)-Zn(2)-S(6)       | 126.49(6) |
| S(6)#7-Ba(2)-S(4)   | 82.61(4)  | S(8)-Zn(2)-S(7)       | 127.01(6) |
| S(6)#2-Ba(2)-S(6)#7 | 128.30(6) | S(5)-Ge(1)-S(3)       | 104.48(6) |
| S(7)-Ba(2)-S(3)#6   | 81.72(4)  | S(5)-Ge(1)-S(6)       | 118.80(6) |
| S(7)-Ba(2)-S(3)     | 66.96(3)  | S(5)-Ge(1)-S(7)       | 119.18(6) |
| S(7)#6-Ba(2)-S(3)   | 81.72(4)  | S(6)-Ge(1)-S(3)       | 106.19(6) |
| S(7)#6-Ba(2)-S(3)#6 | 66.96(3)  | S(7)-Ge(1)-S(3)       | 105.90(6) |
| S(7)#6-Ba(2)-S(4)   | 133.54(3) | S(7)-Ge(1)-S(6)       | 101.14(5) |
| S(7)#6-Ba(2)-S(4)#6 | 81.93(4)  | S(1)#10-Ge(2)-S(8)    | 107.56(5) |
| S(7)-Ba(2)-S(4)     | 81.93(4)  | S(2)#10-Ge(2)-S(1)#10 | 100.69(6) |
| S(7)-Ba(2)-S(4)#6   | 133.54(3) | S(2)#10-Ge(2)-S(8)    | 107.63(5) |
| S(7)#6-Ba(2)-S(6)#2 | 70.31(4)  | S(4)-Ge(2)-S(1)#10    | 117.47(6) |
| S(7)-Ba(2)-S(6)#7   | 70.31(4)  | S(4)-Ge(2)-S(2)#10    | 117.62(6) |
| S(7)#6-Ba(2)-S(6)#7 | 142.81(3) | S(4)-Ge(2)-S(8)       | 105.29(6) |

Symmetry transformations used to generate equivalent atoms:

#1  $-x+1/2, -y+3/2, z$ ; #2  $x-1/4, -y+5/4, z-1/4$ ; #3  $-x+3/4, y+1/4, z-1/4$ ; #4  $x-1/2, y, z+1/2$ ;

#5  $-x+1, -y+3/2, z+1/2$ ; #6  $-x+1, -y+1, z$ ; #7  $-x+5/4, y-1/4, z-1/4$ ; #8  $-x+1, -y+3/2, z-1/2$ ;

#9  $-x+5/4, y+1/4, z+1/4$ ; #10  $x+1/4, -y+5/4, z-3/4$ ; #11  $x+1/4, -y+5/4, z+1/4$

**Table S11.** Selected bond lengths (Å) of Mg<sub>0.6</sub>Cd<sub>1.4</sub>GeS<sub>4</sub>.

| Atoms           | Distance (Å) | Atoms           | Distance (Å) |
|-----------------|--------------|-----------------|--------------|
| Mg/Cd(1)-S(1)   | 2.6078(12)   | Mg/Cd(2)-S(2)   | 2.6465(8)    |
| Mg/Cd(1)-S(2)   | 2.6528(8)    | Mg/Cd(2)-S(2)#7 | 2.6465(8)    |
| Mg/Cd(1)-S(2)#1 | 2.6528(8)    | Mg/Cd(2)-S(3)#6 | 2.6581(7)    |
| Mg/Cd(1)-S(2)#2 | 2.7450(9)    | Mg/Cd(2)-S(3)#8 | 2.6581(7)    |
| Mg/Cd(1)-S(2)#3 | 2.7450(9)    | Ge(1)-S(1)#6    | 2.2334(12)   |
| Mg/Cd(1)-S(3)#4 | 2.7290(12)   | Ge(1)-S(2)      | 2.2265(9)    |
| Mg/Cd(2)-S(1)#6 | 2.6002(7)    | Ge(1)-S(2)#5    | 2.2265(8)    |
| Mg/Cd(2)-S(1)#8 | 2.6002(7)    | Ge(1)-S(3)      | 2.1793(11)   |

Symmetry transformations used to generate equivalent atoms:

#1  $-x+1/2, -y+3/2, z$ ; #2  $x-1/4, -y+5/4, z-1/4$ ; #3  $-x+3/4, y+1/4, z-1/4$ ; #4  $x-1/2, y, z+1/2$ ;  
#5  $-x+1, -y+3/2, z+1/2$ ; #6  $-x+1, -y+1, z$ ; #7  $-x+5/4, y-1/4, z-1/4$ ; #8  $-x+1, -y+3/2, z-1/2$

**Table S12.** Selected bond angles (°) of Mg<sub>0.6</sub>Cd<sub>1.4</sub>GeS<sub>4</sub>.

| Atoms                  | Angle (°)  | Atoms                  | Angle (°) |
|------------------------|------------|------------------------|-----------|
| S(1)-Mg/Cd(1)-S(2)     | 95.49(2)   | S(1)#6-Mg/Cd(2)-S(3)#6 | 93.24(2)  |
| S(1)-Mg/CdCd(1)-S(2)#1 | 95.50(2)   | S(1)#6-Mg/Cd(2)-S(3)#8 | 86.76(2)  |
| S(1)-Mg/Cd(1)-S(2)#2   | 93.88(3)   | S(1)#8-Mg/Cd(2)-S(2)   | 97.11(3)  |
| S(1)-Mg/Cd(1)-S(2)#3   | 93.88(3)   | S(1)#8-Mg/Cd(2)-S(2)#7 | 82.89(3)  |
| S(1)-Mg/Cd(1)-S(3)#4   | 172.68(4)  | S(1)#8-Mg/Cd(2)-S(3)#6 | 86.76(2)  |
| S(2)-Mg/Cd(1)-S(2)#2   | 88.746(14) | S(1)#8-Mg/Cd(2)-S(3)#8 | 93.24(2)  |
| S(2)-Mg/Cd(1)-S(2)#3   | 164.39(3)  | S(2)-Mg/Cd(2)-S(2)#7   | 180.0     |
| S(2)-Mg/Cd(1)-S(3)#4   | 89.06(2)   | S(2)-Mg/Cd(2)-S(3)#6   | 96.40(3)  |
| S(2)#1-Mg/Cd(1)-S(2)   | 102.72(4)  | S(2)-Mg/Cd(2)-S(3)#8   | 83.60(3)  |
| S(2)#1-Mg/Cd(1)-S(2)#2 | 164.39(3)  | S(2)#7-Mg/Cd(2)-S(3)#6 | 83.60(3)  |
| S(2)#1-Mg/Cd(1)-S(2)#3 | 88.745(14) | S(2)#7-Mg/Cd(2)-S(3)#8 | 96.40(3)  |
| S(2)#1-Mg/Cd(1)-S(3)#4 | 89.06(2)   | S(3)#6-Mg/Cd(2)-S(3)#8 | 180.00(4) |
| S(2)#2-Mg/Cd(1)-S(2)#3 | 78.18(4)   | S(2)-Ge(1)-S(1)#6      | 102.29(3) |
| S(3)#4-Mg/Cd(1)-S(2)#2 | 80.47(3)   | S(2)-Ge(1)-S(2)#5      | 102.03(4) |
| S(3)#4-Mg/Cd(1)-S(2)#3 | 80.47(3)   | S(2)#5-Ge(1)-S(1)#6    | 102.29(3) |
| S(1)#6-Mg/Cd(2)-S(1)#8 | 180.00(4)  | S(3)-Ge(1)-S(1)#6      | 116.20(5) |
| S(1)#6-Mg/Cd(2)-S(2)   | 82.89(3)   | S(3)-Ge(1)-S(2)        | 115.93(3) |
| S(1)#6-Mg/Cd(2)-S(2)#7 | 97.11(3)   | S(3)-Ge(1)-S(2)#5      | 115.93(3) |

Symmetry transformations used to generate equivalent atoms:

#1  $-x+1/2, -y+3/2, z$ ; #2  $x-1/4, -y+5/4, z-1/4$ ; #3  $-x+3/4, y+1/4, z-1/4$ ; #4  $x-1/2, y, z+1/2$ ;  
#5  $-x+1, -y+3/2, z+1/2$ ; #6  $-x+1, -y+1, z$ ; #7  $-x+5/4, y-1/4, z-1/4$ ; #8  $-x+1, -y+3/2, z-1/2$



**Table S13.** Selected bond lengths (Å) of CaCdGeS<sub>4</sub>.

| Atoms           | Distance (Å) | Atoms            | Distance (Å) |
|-----------------|--------------|------------------|--------------|
| Ca/Cd(1)-S(1)   | 2.7396(12)   | Ca/Cd(2)-S(2)#6  | 2.7035(7)    |
| Ca/Cd(1)-S(2)#1 | 2.7686(8)    | Ca/Cd(2)-S(2)#9  | 2.7035(7)    |
| Ca/Cd(1)-S(2)#2 | 2.8187(9)    | Ca/Cd(2)-S(3)#10 | 2.7674(8)    |
| Ca/Cd(1)-S(2)#3 | 2.7686(8)    | Ca/Cd(2)-S(3)#11 | 2.7674(8)    |
| Ca/Cd(1)-S(2)#4 | 2.8187(9)    | Ge(1)-S(1)       | 2.2344(11)   |
| Ca/Cd(1)-S(3)#5 | 2.8403(12)   | Ge(1)-S(2)       | 2.2252(8)    |
| Ca/Cd(2)-S(1)   | 2.6516(7)    | Ge(1)-S(2)#6     | 2.2252(8)    |
| Ca/Cd(2)-S(1)#8 | 2.6516(7)    | Ge(1)-S(3)       | 2.1772(12)   |

Symmetry transformations used to generate equivalent atoms:

#1  $-x+1/2, -y+3/2, z$ ; #2  $x-1/4, -y+5/4, z-1/4$ ; #3  $-x+3/4, y+1/4, z-1/4$ ; #4  $x-1/2, y, z+1/2$ ;  
#5  $-x+1, -y+3/2, z+1/2$ ; #6  $-x+1, -y+1, z$ ; #7  $-x+5/4, y-1/4, z-1/4$ ; #8  $-x+1, -y+3/2, z-1/2$ ;  
#9  $-x+5/4, y+1/4, z+1/4$ ; #10  $x+1/4, -y+5/4, z-3/4$ ; #11  $x+1/4, -y+5/4, z+1/4$

**Table S14.** Selected bond angles (°) of CaCdGeS<sub>4</sub>.

| Atoms                  | Angle (°)  | Atoms                    | Angle (°) |
|------------------------|------------|--------------------------|-----------|
| S(1)-Ca/Cd(1)-S(2)#1   | 93.99(2)   | S(1)#12-Ca/Cd(2)-S(2)#6  | 98.79(3)  |
| S(1)-Ca/Cd(1)-S(2)#2   | 94.31(3)   | S(1)#12-Ca/Cd(2)-S(2)#9  | 81.21(3)  |
| S(1)-Ca/Cd(1)-S(2)#3   | 93.99(2)   | S(1)-Ca/Cd(2)-S(3)#10    | 85.90(2)  |
| S(1)-Ca/Cd(1)-S(2)#4   | 94.31(3)   | S(1)-Ca/Cd(2)-S(3)#11    | 94.10(2)  |
| S(1)-Ca/Cd(1)-S(3)#5   | 173.68(4)  | S(1)#12-Ca/Cd(2)-S(3)#10 | 94.10(2)  |
| S(2)#1-Ca/Cd(1)-S(2)#2 | 88.433(14) | S(1)#12-Ca/Cd(2)-S(3)#11 | 85.90(2)  |
| S(2)#1-Ca/Cd(1)-S(2)#4 | 163.22(3)  | S(2)#6-Ca/Cd(2)-S(2)#9   | 180.0     |
| S(2)#2-Ca/Cd(1)-S(2)#4 | 76.42(3)   | S(2)#6-Ca/Cd(2)-S(3)#10  | 84.13(3)  |
| S(2)#3-Ca/Cd(1)-S(2)#1 | 105.50(4)  | S(2)#6-Ca/Cd(2)-S(3)#11  | 95.87(3)  |
| S(2)#3-Ca/Cd(1)-S(2)#2 | 163.22(3)  | S(2)#9-Ca/Cd(2)-S(3)#10  | 95.87(3)  |
| S(2)#3-Ca/Cd(1)-S(2)#4 | 88.433(14) | S(2)#9-Ca/Cd(2)-S(3)#11  | 84.13(3)  |
| S(2)#1-Ca/Cd(1)-S(3)#5 | 89.83(2)   | S(3)#11-Ca/Cd(2)-S(3)#10 | 180.0     |
| S(2)#2-Ca/Cd(1)-S(3)#5 | 80.74(3)   | S(2)-Ge(1)-S(1)          | 102.81(3) |
| S(2)#3-Ca/Cd(1)-S(3)#5 | 89.83(2)   | S(2)#6-Ge(1)-S(1)        | 102.81(3) |
| S(2)#4-Ca/Cd(1)-S(3)#5 | 80.74(3)   | S(2)#6-Ge(1)-S(2)        | 103.18(4) |
| S(1)-Ca/Cd(2)-S(1)#12  | 180.0      | S(3)-Ge(1)-S(1)          | 115.59(4) |
| S(1)-Ca/Cd(2)-S(2)#6   | 81.21(3)   | S(3)-Ge(1)-S(2)          | 115.32(3) |
| S(1)-Ca/Cd(2)-S(2)#9   | 98.79(3)   | S(3)-Ge(1)-S(2)#6        | 115.32(3) |

Symmetry transformations used to generate equivalent atoms:

#1  $-x+1/2, -y+3/2, z$ ; #2  $x-1/4, -y+5/4, z-1/4$ ; #3  $-x+3/4, y+1/4, z-1/4$ ; #4  $x-1/2, y, z+1/2$ ;  
 #5  $-x+1, -y+3/2, z+1/2$ ; #6  $-x+1, -y+1, z$ ; #7  $-x+5/4, y-1/4, z-1/4$ ; #8  $-x+1, -y+3/2, z-1/2$ ;  
 #9  $-x+5/4, y+1/4, z+1/4$ ; #10  $x+1/4, -y+5/4, z-3/4$ ; #11  $x+1/4, -y+5/4, z+1/4$

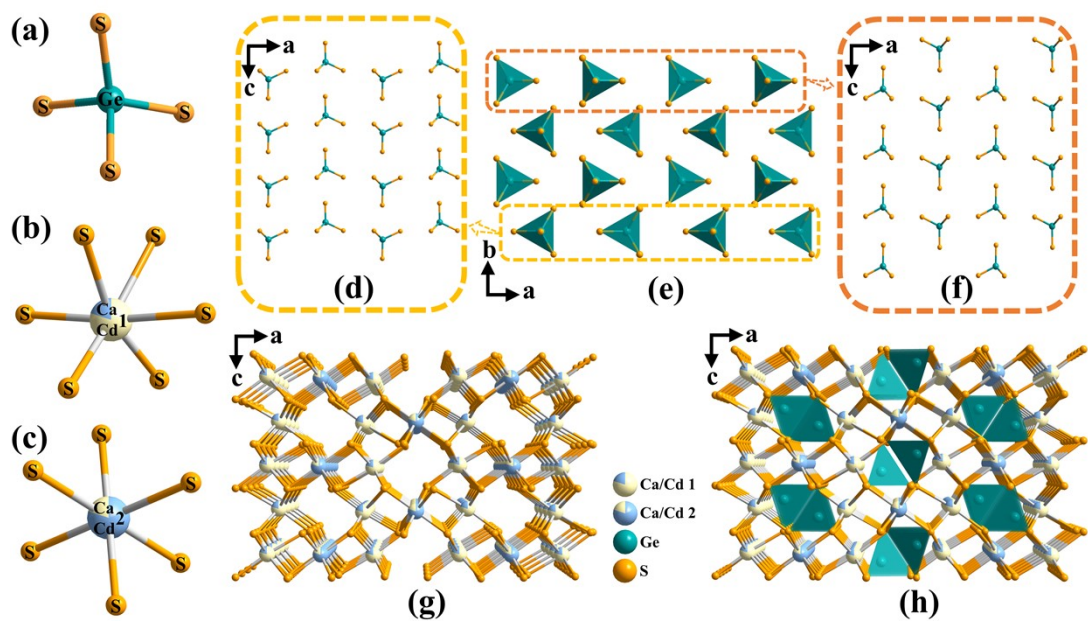

**Figure S1.** Crystal structure of  $\text{CaCdGeS}_4$ . (a-c) The coordination environments of Ge and M (Ca/Cd) atoms; (d-f) The formed  $[\text{GeS}_4]_\infty$  pseudo-layers viewed along  $b$  and  $c$  directions, respectively; (g) The formed  $[\text{MS}_6]_\infty$  framework; (h) The 3D crystal structure of  $\text{CaCdGeS}_4$  along  $c$  direction.

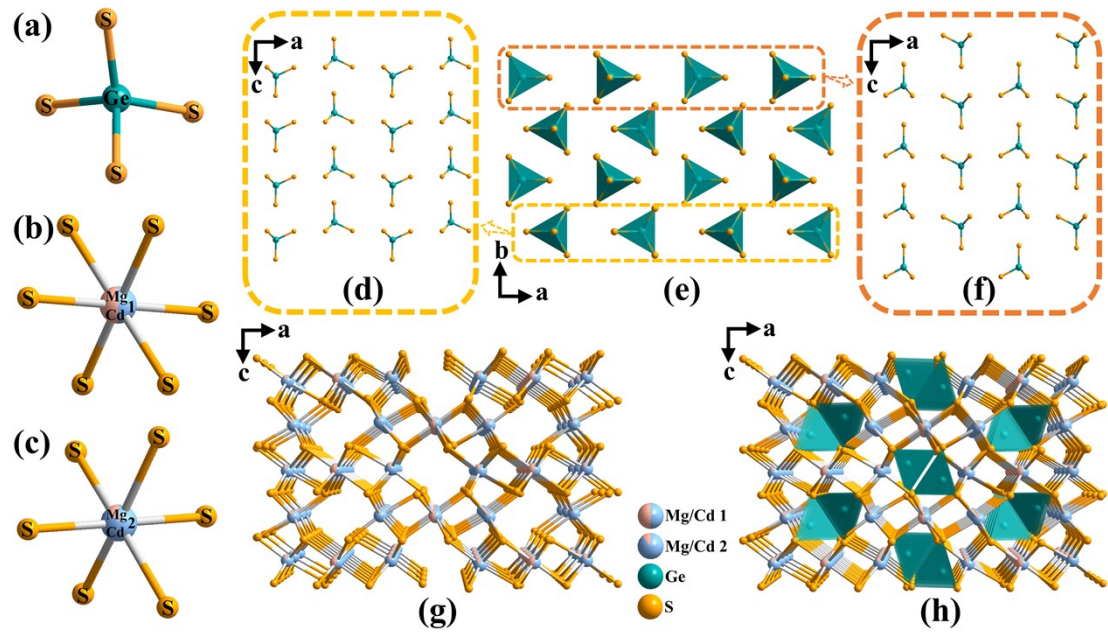

**Figure S2.** Crystal structure of  $\text{Mg}_{0.6}\text{Cd}_{1.4}\text{GeS}_4$ . (a-c) The coordination environments of Ge and N (Mg/Cd) atoms; (d-f) The formed  $[\text{GeS}_4]_\infty$  pseudo-layers viewed along  $b$  and  $c$  directions, respectively; (g) The formed  $[\text{NS}_6]_\infty$  framework; (h) The 3D crystal structure of  $\text{Mg}_{0.6}\text{Cd}_{1.4}\text{GeS}_4$  along  $c$  direction.

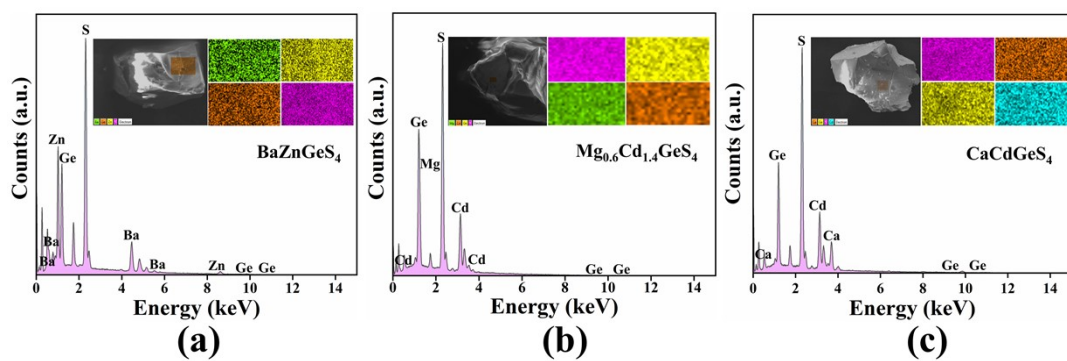

**Figure S3.** X-ray energy dispersive spectra of (a) BaZnGeS<sub>4</sub>, (b) Mg<sub>0.6</sub>Cd<sub>1.4</sub>GeS<sub>4</sub>, and (c) CaCdGeS<sub>4</sub>.

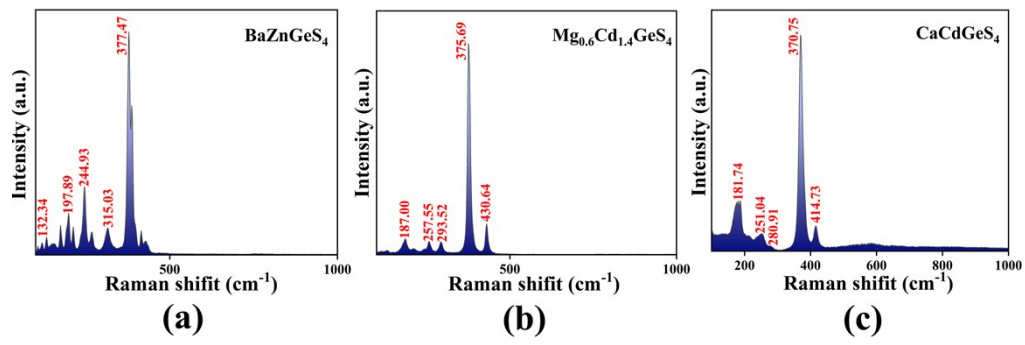

**Figure S4.** Raman spectra of (a) BaZnGeS<sub>4</sub>, (b) Mg<sub>0.6</sub>Cd<sub>1.4</sub>GeS<sub>4</sub>, and (c) CaCdGeS<sub>4</sub>.

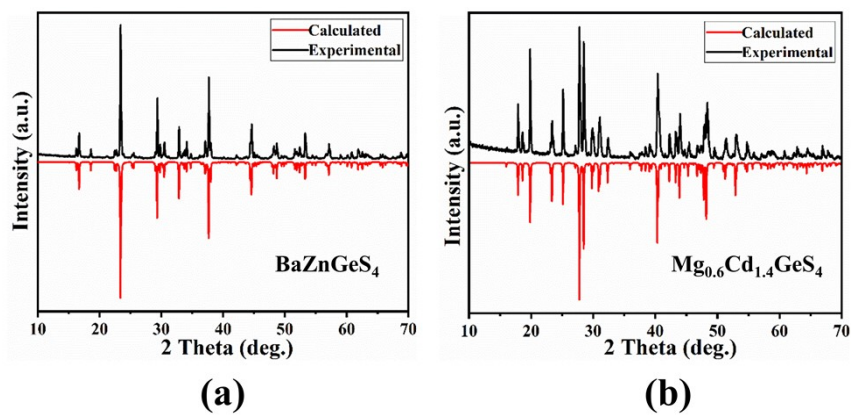

**Figure S5.** Experimental and calculated XRD patterns for (a) BaZnGeS<sub>4</sub> and (b) Mg<sub>0.6</sub>Cd<sub>1.4</sub>GeS<sub>4</sub>.

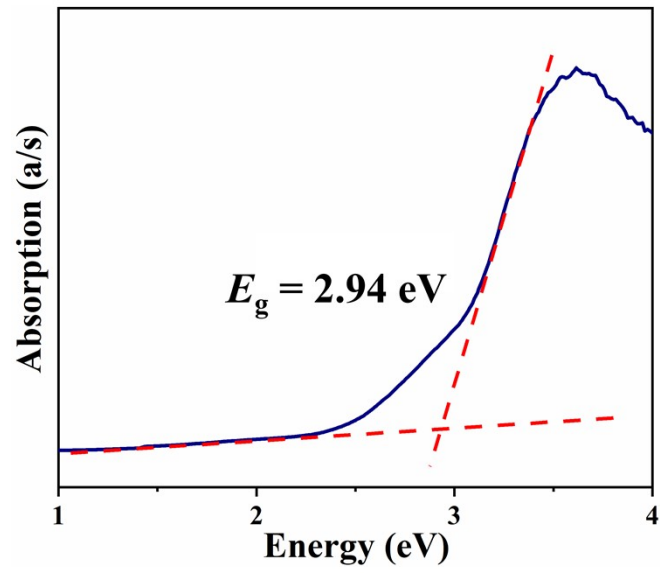

**Figure S6.** The experimental band gap of  $\text{Mg}_{0.6}\text{Cd}_{1.4}\text{GeS}_4$ .



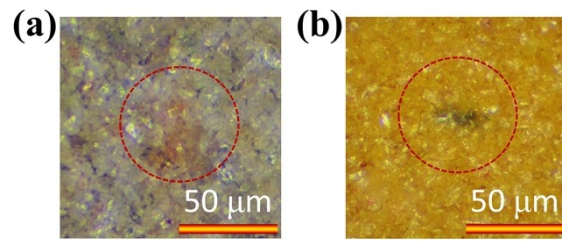

**Figure S7.** The optical images showing the laser-induced damages in BaZnGeS<sub>4</sub> (a) and AgGaS<sub>2</sub> (b) under a pulsed YAG laser (1.06 μm, 10 ns, 1 Hz).

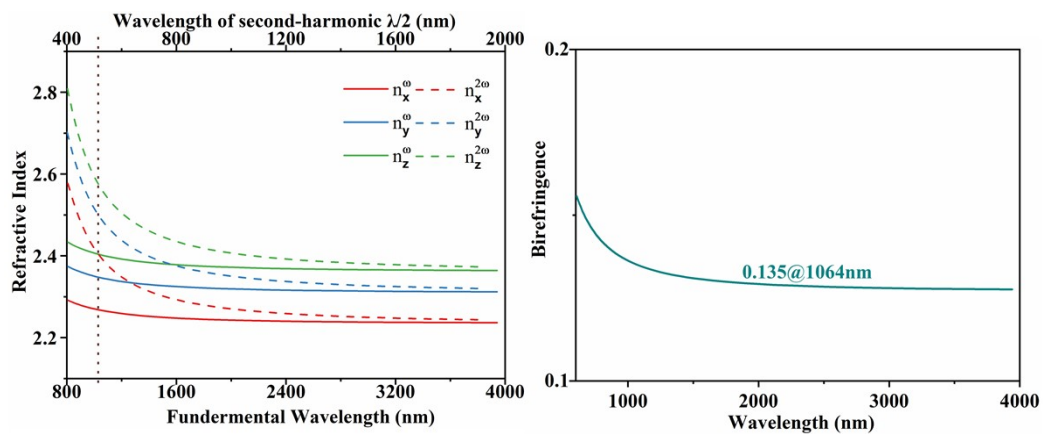

**Figure S8.** Calculated refractive index dispersion curves (a) and birefringence curve (b) of BaZnGeS<sub>4</sub>.

## Reference

1. Q. Liu, X. Liu, L. Wu and L. Chen, SrZnGeS<sub>4</sub>: a dual-waveband nonlinear optical material with a transparency spanning UV/Vis and Far-IR spectral regions, *Angew. Chem. Int. Ed.*, 2022, **61**, e202205587.
2. H. Yang, M. Ran, S. Zhou, X. Wu, H. Lin and Q. Zhu, Rational design via dual-site aliovalent substitution leads to an outstanding IR nonlinear optical material with well-balanced comprehensive properties, *Chem. Sci.*, 2022, **13**, 10725-10733.
3. Y. Li, Z. Chen, W. Yao, R. Tang and S. Guo, Heterovalent cations substitution to design asymmetric chalcogenides with promising nonlinear optical performances, *J. Mater. Chem. C*, 2021, **9**, 8659-8665.
4. Y. Zhang, D. Mei, Y. Yang, W. Cao, Y. Wu, J. Lu and Z. Lin, Rational design of a new chalcogenide with good infrared nonlinear optical performance: SrZnSnS<sub>4</sub>, *J. Mater. Chem. C*, 2019, **7**, 8556-8561.
5. C. L. Teske\*, Darstellung und Kristallstruktur von Barium-Quecksilber-Thiostannat(IV), BaHgSnS<sub>4</sub>, *Z. Naturforsch.*, 1980, **35b**, 7-11
6. G. Yangwu, F. Liang, Z. Li, W. Xing, Z. Lin, J. Yao, A. Mar and Y. Wu, AHgSnQ<sub>4</sub> (A = Sr, Ba; Q = S, Se): a series of Hg-Based infrared nonlinear-optical materials with strong second-harmonic-generation response and good phase matchability, *Inorg. Chem.*, 2019, **58**, 10390-10398.
7. Y. Dou, Y. Chen, Z. Li, A. K. Iyer, B. Kang, W. Yin, J. Yao and A. Mar, SrCdGeS<sub>4</sub> and SrCdGeSe<sub>4</sub>: promising infrared nonlinear optical materials with congruent-melting behavior, *Cryst. Growth Des.*, 2019, **19**, 1206-1214.
8. Y. Lin, R. Ye, L. Yang, X. Jiang, B. Liu, H. Zeng and G. Guo, BaMnSnS<sub>4</sub> and BaCdGeS<sub>4</sub>: infrared nonlinear optical sulfides containing highly distorted motifs with centers of moderate electronegativity, *Inorg. Chem. Front.*, 2019, **6**, 2365-2368.
9. N. Zhen, K. Wu, Y. Wang, Q. Li, W. Gao, D. Hou, Z. Yang, H. Jiang, Y. Dong and S. Pan, BaCdSnS<sub>4</sub> and Ba<sub>3</sub>CdSn<sub>2</sub>S<sub>8</sub>: syntheses, structures, and non-linear optical and photoluminescence properties, *Dalton Trans.*, 2016, **45**, 10681-10688.
10. Y. Lin, B. Liu, R. Ye, X. Jiang, L. Yang, H. Zeng and G. Guo, SrCdSnQ<sub>4</sub> (Q = S and Se): infrared nonlinear optical chalcogenides with mixed NLO-active and synergetic distorted motifs, *J. Mater. Chem. C*, 2019, **7**, 4459-4465.
11. W. Yin, A. K. Iyer, C. Li, J. Yao and A. Mar, Noncentrosymmetric chalcogenides BaZnSiSe<sub>4</sub> and BaZnGeSe<sub>4</sub> featuring one-dimensional structures, *J. Alloys Compd.*, 2017, **708**, 414-421.
12. Y. Guo, F. Liang, W. Yin, Z. Li, X. Luo, Z. Lin, J. Yao, A. Mar and Y. Wu, BaHgGeSe<sub>4</sub> and SrHgGeSe<sub>4</sub>: two new Hg-Based infrared nonlinear optical

- materials, *Chem. Mater.*, 2019, **31**, 3034-3040.
13. K. Wu, X. Su, Z. Yang and S. Pan, An investigation of new infrared nonlinear optical material: BaCdSnSe<sub>4</sub>, and three new related centrosymmetric compounds: Ba<sub>2</sub>SnSe<sub>4</sub>, Mg<sub>2</sub>GeSe<sub>4</sub>, and Ba<sub>2</sub>Ge<sub>2</sub>S<sub>6</sub>, *Dalton Trans.*, 2015, **44**, 19856-19864.
  14. F. Yuan, C. Lin, Y. Huang, H. Zhang, A. Zhou, G. Chai and W. Cheng, BaCdGeSe<sub>4</sub>: synthesis, structure and nonlinear optical properties, *J Solid State Chem.*, 2021, **302**, 122352.
  15. M. Ma, J. Dang, Y. Wu, X. Jiang and D. Mei, Optimal design of mid-infrared nonlinear-optical crystals: from SrZnSnSe<sub>4</sub> to SrZnSiSe<sub>4</sub>, *Inorg. Chem.*, 2023, **62**, 6549-6553.
  16. A. Assoud, N. Soheilnia and H. Kleinke, Band gap tuning in new strontium seleno-stannates, *Chem. Mater.*, 2004, **16**, 2215-2221.
